# Supplementary material for: Sulphate-activated growth of bamboo-like carbon nanotubes over copper catalysts
Source: Royal Society of Chemistry journal article supplement (doi:10.1039/c2nr30854a), 2012-01-01
Supplement: c2nr30854a.pdf [file c2nr30854a.pdf]

## Electronic Supplementary Information

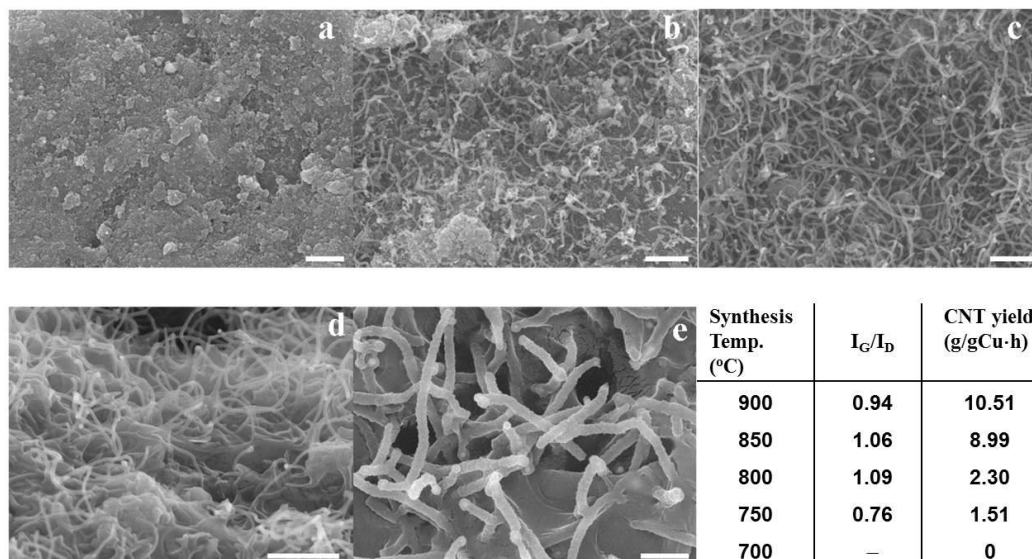

**Fig. S1** SEM images of the as-grown CNTs over 10.36 wt%  $\text{CuSO}_4/\gamma\text{-Al}_2\text{O}_3$  catalyst with varying reaction temperatures for 30 min. (a) 700 °C, (b) 750 °C, (c) 800 °C, (d) 850 °C and (e) 900 °C. The table displays the  $I_G/I_D$  ratios and the growth yields of the as-grown CNTs with different temperatures. The total flow rate is 100 mL/min. The scale bar in (a)-(e) is 1  $\mu\text{m}$ .

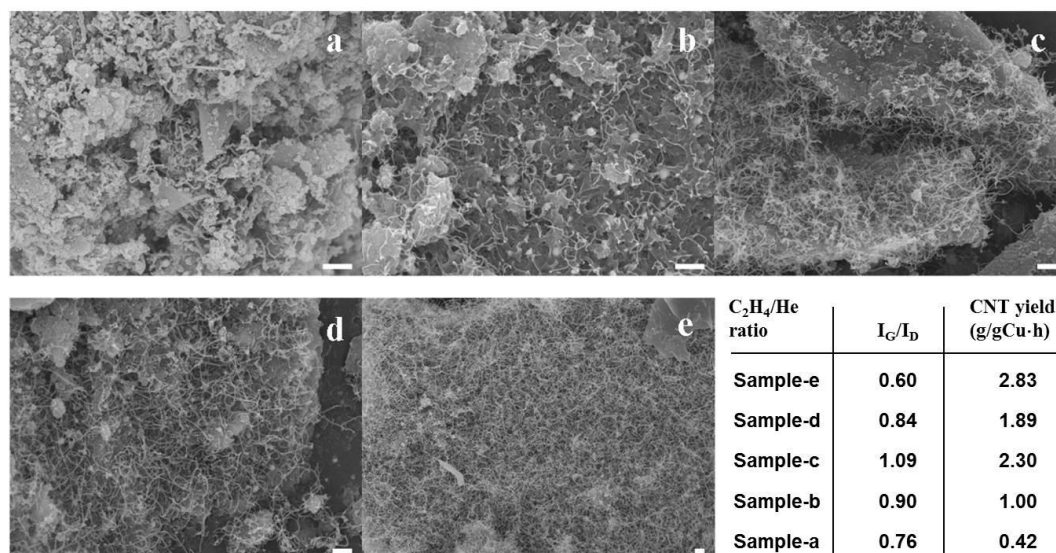

**Fig. S2** SEM images of the as-grown CNTs over 10.36 wt%  $\text{CuSO}_4/\gamma\text{-Al}_2\text{O}_3$  catalyst with varying diluted ratios of carbon source at 800 °C for 30 min. (a)  $\text{C}_2\text{H}_4/\text{He}=1/3$ , (b)  $\text{C}_2\text{H}_4/\text{He}=1/6$ , (c)  $\text{C}_2\text{H}_4/\text{He}=1/9$ , (d)  $\text{C}_2\text{H}_4/\text{He}=1/12$  and (e)  $\text{C}_2\text{H}_4/\text{He}=1/15$ . The total flow rate is 100 mL/min. The scale bar in (a)-(e) is 1  $\mu\text{m}$ .

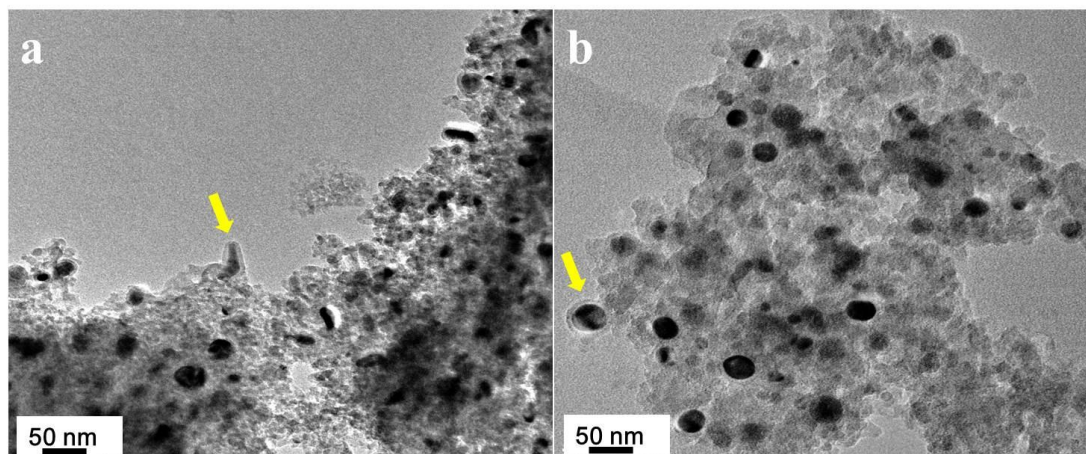

**Fig. S3** TEM images of the amorphous carbons grown over (a) 10.25 wt%  $\text{Cu}(\text{CH}_3\text{COO})_2/\gamma\text{-Al}_2\text{O}_3$  and (b) 9.99 wt%  $\text{Cu}(\text{NO}_3)_2/\gamma\text{-Al}_2\text{O}_3$  catalysts at 800 °C for 30 min with a helium dilute ethylene ( $\text{C}_2\text{H}_4/\text{He}=1/9 = 100 \text{ mL/min}$ ).

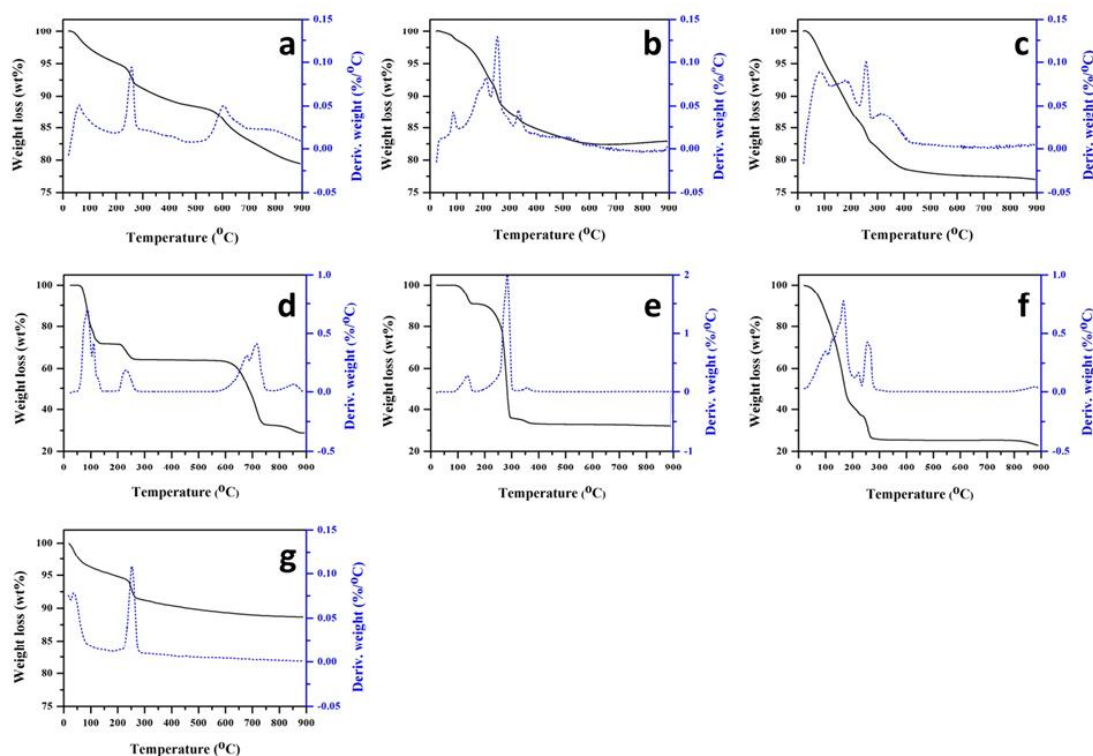

**Fig. S4** Thermal decomposition curves of (a)  $\text{CuSO}_4/\gamma\text{-Al}_2\text{O}_3$ , (b)  $\text{Cu}(\text{CH}_3\text{COO})_2/\gamma\text{-Al}_2\text{O}_3$ , (c)  $\text{Cu}(\text{NO}_3)_2/\gamma\text{-Al}_2\text{O}_3$ , (d)  $\text{CuSO}_4 \cdot 5\text{H}_2\text{O}$ , (e)  $\text{Cu}(\text{CH}_3\text{COO})_2 \cdot \text{H}_2\text{O}$ , (f)  $\text{Cu}(\text{NO}_3)_2 \cdot 3\text{H}_2\text{O}$  and (g)  $\gamma\text{-Al}_2\text{O}_3$  using TGA analysis in helium with a flow of 40 mL/min. The Cu contents of (a), (b), (c) are 10.36, 10.25 and 9.99 wt% respectively and determined by ICP-MS.
